# Supplementary material for: Current status of model predictions on volatile organic compounds and impacts on surface ozone predictions during summer in China
Source: Copernicus journal article supplement (doi:10.5194/egusphere-2023-1358), 2023-08-02
Supplement: Supplementary file 1 [file egusphere-2023-1358-supplement.pdf]

## Supplemental Materials

1

2 Table S1. List of sampling sites and periods in the field campaign of ATMSYC project.

| Regions       | Cities       | Station code | Start time | End time  | Nos        | Latitude    | Longitude   |
|---------------|--------------|--------------|------------|-----------|------------|-------------|-------------|
| NCP           | Beijing      | BJ-B         | 2 August   | 24 August | 57         | 40°24'28"N  | 116°40'26"E |
|               |              | BJ-U         | 2 August   | 24 August | 57         | 39°58'28"N  | 116°22'13"E |
|               | Shijiazhuang | SJZ-B        | 29 June    | 4 July    | 18         | 37°59'52"N  | 114°30'56"E |
|               |              | SJZ-U        | 29 June    | 4 July    | 17         | 38°02'35"N  | 114°30'15"E |
|               | Ji'nan       | JN-B         | 29 June    | 5 July    | 17         | 36°35'56"N  | 117°02'46"E |
|               |              | JN-U         | 29 June    | 5 July    | 18         | 36°40'23"N  | 117°03'01"E |
| Northwest     | Lanzhou      | LZ-B         | 1 August   | 18 August | 53         | 35°56'35"N  | 104°09'11"E |
|               |              | LZ-U         | 1 August   | 18 August | 52         | 36°06'11"N  | 103°37'48"E |
| YRD           | Shanghai     | SH-B         | 1 August   | 24 August | 60         | 31°31'26"N  | 121°57'32"E |
|               |              | SH-U         | 1 August   | 24 August | 55         | 31°11'27"N  | 121°26'04"E |
| Central China | Wuhan        | WH-B         | 1 August   | 11 August | 42         | 30°21'40"N  | 114°20'10"E |
|               |              | WH-U         | 1 August   | 11 August | 39         | 30°31'50"N  | 114°18'28"E |
|               | Zhengzhou    | ZZ-B         | 29 June    | 4 July    | 17         | 34°51'35"N  | 113°24'24"E |
|               |              | ZZ-U         | 29 June    | 4 July    | 17         | 34°45'12"N  | 113°36'48"E |
| Southwest     | Chengdu      | CD-B         | 6 August   | 20 August | 55         | 30°33'47"N  | 104°16'18"E |
|               |              | CD-U         | 6 August   | 20 August | 58         | 30°37'45"N  | 104°03'50"E |
|               | Guiyang      | GY-B         | 29 June    | 4 July    | 18         | 26°38'28"N  | 106°36'60"E |
|               |              | GY-U         | 29 June    | 4 July    | 17         | 26°34'02"N  | 106°41'60"E |
| PRD           | Guangzhou    | GZ-B         | 29 June    | 4 July    | 17         | 23°39'01"N  | 113°37'28"E |
|               |              | GZ-U         | 29 June    | 4 July    | 17         | 23°08'58"N  | 113°21'28"E |
|               | Shenzhen     | SZ           | 6 June     | 14 June   | 18         | 22°35'47"N  | 113°58'22"E |
|               | Huizhou      | HZ           | 6 June     | 14 June   | 13         | 23°03'10"N  | 114°25'06"E |
|               | Jiangmen     | JM           | 7 June     | 13 June   | 17         | 22°35'01"N  | 113°04'23"E |
|               | Dongguan     | DG           | 6 June     | 13 June   | 15         | 23°03'13"N  | 113°46'55"E |
|               | Foshan       | FS           | 6 June     | 13 June   | 17         | 23°00'09"N  | 113°06'13"E |
|               | Zhaoqing     | ZQ           | 6 June     | 13 June   | 18         | 23°02'46"N  | 112°27'52"E |
|               | Zhongshan    | ZS           | 6 June     | 13 June   | 18         | 22°30'40"N  | 113°24'27"E |
| Zhuhai        | ZH           | 6 June       | 13 June    | 17        | 22°14'19"N | 113°29'44"E |             |

3 Nos: Number of observations. For the sites, B representing the background, and U

4 representing the urban, Sites in the PRD belong to Urban.

5 Table S2. The specific classification of VOCs in this study

| Species groups | Species types in saprc07tic | Species included both in observation and simulation                                                                                                                                                 | Remarks                                                                               |
|----------------|-----------------------------|-----------------------------------------------------------------------------------------------------------------------------------------------------------------------------------------------------|---------------------------------------------------------------------------------------|
| Alkanes        | ALK1                        | ethane                                                                                                                                                                                              | kOH between $2$ and $5 \times 10^2$ ppm <sup>-1</sup> min <sup>-1</sup>               |
|                | ALK2                        | n-propane                                                                                                                                                                                           | kOH between $5 \times 10^2$ and $2.5 \times 10^3$ ppm <sup>-1</sup> min <sup>-1</sup> |
|                | ALK3                        | 1-/i-butene, n-butane, isobutane, 2,2-dimethylbutane, 2,2,4-trimethylpentane                                                                                                                        | kOH between $2.5 \times 10^3$ and $5 \times 10^3$ ppm <sup>-1</sup> min <sup>-1</sup> |
|                | ALK4                        | i-pentane, n-pentane, 2-methylpentane, 3-methylpentane, cyclopentane, n-hexane, n-heptane, methylcyclopentane, 2,4-dimethylpentane, 2,3-dimethylpentane, 2,3,4-trimethylpentane, 2,3-dimethylbutane | kOH between $5 \times 10^3$ and $1 \times 10^4$ ppm <sup>-1</sup> min <sup>-1</sup>   |
|                | ALK5                        | cyclohexane, methylcyclohexane, 2-methylhexane, 3-methylhexane, 2-methylheptane, 3-methylheptane, n-octane, n-nonane, n-decane                                                                      | kOH > $1 \times 10^4$ ppm <sup>-1</sup> min <sup>-1</sup>                             |
| Aromatics      | ARO1                        | ethylbenzene, isopropylbenzene, n-propylbenzene                                                                                                                                                     | kOH < $2 \times 10^4$ ppm <sup>-1</sup> min <sup>-1</sup>                             |
|                | ARO2MN                      | 1,2,3-trimethylbenzene, 1,3,5-trimethylbenzene, o-ethyltoluene, 3-ethyltoluene, 4-ethyltoluene, 1,2,4-trimethylbenzene (0.5)                                                                        | kOH > $2 \times 10^4$ ppm <sup>-1</sup> min <sup>-1</sup> , minus naphthalene         |
|                | TOLU                        | toluene                                                                                                                                                                                             |                                                                                       |
|                | BENZ                        | benzene                                                                                                                                                                                             |                                                                                       |
|                | XYL                         | o-xylene, m/p-xylene                                                                                                                                                                                |                                                                                       |
|                | B124                        | 1,2,4-trimethylbenzene (0.5)                                                                                                                                                                        |                                                                                       |
| Alkenes        | OLE1                        | 1-butene, 1-pentene, 3-methyl-1-butene, 4-methyl-1-pentene                                                                                                                                          | kOH < $7 \times 10^4$ ppm <sup>-1</sup> min <sup>-1</sup> , other than ethene         |
|                | OLE2                        | trans-2-butene, cis-2-butene, 2-methyl-1-butene, 2-methyl-2-butene, trans-2-pentene, cis-2-pentene, 2-methyl-1-pentene, cyclopentene, styrene                                                       | kOH > $7 \times 10^4$ ppm <sup>-1</sup> min <sup>-1</sup>                             |
|                | ISOP                        | isoprene                                                                                                                                                                                            |                                                                                       |
|                | ETHE                        | ethylene                                                                                                                                                                                            |                                                                                       |
|                | PRPE                        | propene                                                                                                                                                                                             |                                                                                       |
|                | APIN                        | a-pinene                                                                                                                                                                                            |                                                                                       |
|                | BDE13                       | 1,3-butadiene                                                                                                                                                                                       |                                                                                       |
|                | Alkyne                      | ACYE                                                                                                                                                                                                | acetylene                                                                             |
| HCHO           | HCHO                        | formaldehyde                                                                                                                                                                                        |                                                                                       |

6 kOH: The reaction rate constant between VOCs and Hydroxyl radical (OH).

7 Table S3. Model performance of MDA8 O<sub>3</sub> and NO<sub>2</sub> in the 28 sites from June 6th to August  
 8 24th, 2018

| sites      | MDA8 O <sub>3</sub> (µg/m <sup>3</sup> ) |        |              |             |             | NO <sub>2</sub> (µg/m <sup>3</sup> ) |       |       |      |      |
|------------|------------------------------------------|--------|--------------|-------------|-------------|--------------------------------------|-------|-------|------|------|
|            | OBS                                      | PRE    | NMB          | NME         | R           | OBS                                  | PRE   | NMB   | NME  | R    |
| BJ-B       | 162.84                                   | 165.43 | 0.02         | 0.20        | 0.72        | 24.45                                | 15.49 | -0.37 | 0.40 | 0.40 |
| BJ-U       | 164.44                                   | 193.04 | <b>0.17</b>  | 0.23        | 0.75        | 34.19                                | 29.61 | -0.13 | 0.31 | 0.11 |
| SJZ-B      | 170.29                                   | 168.29 | -0.01        | 0.21        | 0.66        | 25.20                                | 39.46 | 0.57  | 0.63 | 0.19 |
| SJZ-U      | 163.98                                   | 168.29 | 0.03         | 0.22        | 0.64        | 29.70                                | 39.46 | 0.33  | 0.41 | 0.30 |
| JN-B       | 175.43                                   | 161.04 | -0.08        | 0.19        | 0.68        | 21.05                                | 26.08 | 0.24  | 0.41 | 0.46 |
| JN-U       | 167.26                                   | 161.04 | -0.04        | 0.18        | 0.72        | 36.91                                | 26.08 | -0.29 | 0.34 | 0.46 |
| LZ-B       | 118.63                                   | 116.73 | -0.02        | 0.11        | 0.66        | 15.78                                | 6.23  | -0.61 | 0.61 | 0.22 |
| LZ-U       | 165.22                                   | 135.31 | <b>-0.18</b> | <b>0.25</b> | 0.65        | 38.06                                | 20.75 | -0.46 | 0.46 | 0.18 |
| SH-B       | 106.43                                   | 88.93  | <b>-0.16</b> | <b>0.33</b> | 0.57        | 21.04                                | 1.43  | -0.93 | 0.93 | 0.45 |
| SH-U       | 113.56                                   | 136.59 | <b>0.20</b>  | <b>0.29</b> | 0.80        | 23.01                                | 32.99 | 0.43  | 0.47 | 0.70 |
| WH-B       | 140.23                                   | 141.09 | 0.01         | 0.23        | 0.70        | 36.42                                | 37.62 | 0.03  | 0.27 | 0.47 |
| WH-U       | 126.62                                   | 141.09 | 0.11         | 0.25        | 0.72        | 35.46                                | 37.62 | 0.06  | 0.22 | 0.51 |
| ZZ-B       | 150.74                                   | 172.08 | 0.14         | 0.23        | 0.61        | 34.96                                | 36.51 | 0.05  | 0.22 | 0.52 |
| ZZ-U       | 147.25                                   | 158.44 | 0.08         | 0.24        | 0.66        | 39.16                                | 34.23 | -0.13 | 0.22 | 0.49 |
| CD-B       | 114.06                                   | 119.92 | 0.05         | 0.25        | 0.62        | 43.09                                | 30.80 | -0.29 | 0.36 | 0.14 |
| CD-U       | 140.56                                   | 133.25 | -0.05        | <b>0.28</b> | 0.56        | 30.99                                | 59.51 | 0.92  | 0.94 | 0.14 |
| GY-B       | 89.98                                    | 95.00  | 0.06         | 0.15        | 0.82        | 16.76                                | 18.54 | 0.11  | 0.34 | 0.44 |
| GY-U       | 85.49                                    | 95.00  | 0.11         | 0.19        | 0.79        | 30.06                                | 18.54 | -0.38 | 0.39 | 0.67 |
| GZ-B       | 106.09                                   | 121.60 | 0.15         | <b>0.35</b> | <b>0.37</b> | 21.72                                | 12.24 | -0.44 | 0.44 | 0.71 |
| GZ-U       | 115.63                                   | 144.78 | <b>0.25</b>  | <b>0.34</b> | 0.55        | 35.30                                | 23.71 | -0.33 | 0.36 | 0.56 |
| SZ         | 80.73                                    | 112.05 | <b>0.39</b>  | <b>0.50</b> | 0.71        | 20.97                                | 31.38 | 0.50  | 0.52 | 0.67 |
| HZ         | 97.19                                    | 111.21 | 0.15         | <b>0.27</b> | 0.75        | 21.99                                | 19.57 | -0.11 | 0.24 | 0.65 |
| JM         | 104.73                                   | 118.35 | 0.13         | <b>0.28</b> | 0.82        | 28.08                                | 19.39 | -0.31 | 0.34 | 0.54 |
| DG         | 118.77                                   | 139.30 | <b>0.21</b>  | <b>0.35</b> | 0.64        | 32.25                                | 24.93 | -0.23 | 0.27 | 0.62 |
| FS         | 113.21                                   | 148.99 | <b>0.32</b>  | <b>0.44</b> | 0.64        | 33.31                                | 27.79 | -0.17 | 0.28 | 0.51 |
| ZQ         | 109.02                                   | 117.98 | 0.08         | 0.23        | 0.76        | 30.94                                | 12.00 | -0.61 | 0.62 | 0.40 |
| ZS         | 102.66                                   | 134.08 | <b>0.31</b>  | <b>0.42</b> | 0.79        | 12.87                                | 17.42 | 0.35  | 0.49 | 0.65 |
| ZH         | 92.39                                    | 114.00 | <b>0.23</b>  | <b>0.38</b> | 0.72        | 13.71                                | 9.30  | -0.32 | 0.52 | 0.49 |
| Benchmarks |                                          |        | <=±0.15      | <0.25       | >0.5        |                                      |       |       |      |      |

9 OBS: mean observation; PRE: mean prediction; NMB: normalized mean bias; NME:  
 10 normalized mean error; R: the correlation coefficient. The performance criteria for MDA8 O<sub>3</sub>  
 11 were suggested by (Emery et al., 2017). The values that exceed the criteria were highlighted  
 12 in bold.

13 Table S4. Comparison of mean values of O<sub>3</sub>, NO<sub>2</sub> and TVOCs concentrations at 28 sites  
 14 during the study period

| sites | O <sub>3</sub> (µg/m <sup>3</sup> ) |        | NO <sub>2</sub> (µg/m <sup>3</sup> ) |       | TVOCs (ppbv) |       |
|-------|-------------------------------------|--------|--------------------------------------|-------|--------------|-------|
|       | OBS                                 | PRE    | OBS                                  | PRE   | OBS          | PRE   |
| BJ-B  | 139.32                              | 150.78 | 14.85                                | 8.35  | 23.19        | 18.36 |
| BJ-U  | 140.94                              | 188.26 | 23.65                                | 20.62 | 33.24        | 30.45 |
| SJZ-B | 164.56                              | 164.68 | 29.65                                | 14.88 | 35.59        | 14.47 |
| SJZ-U | 150.50                              | 161.58 | 29.19                                | 15.09 | 35.47        | 14.67 |
| JN-B  | 135.33                              | 158.06 | 42.94                                | 11.15 | 53.37        | 12.03 |
| JN-U  | 144.75                              | 161.99 | 41.82                                | 11.13 | 61.93        | 12.07 |
| LZ-B  | 97.59                               | 107.96 | 13.49                                | 3.19  | 33.16        | 5.16  |
| LZ-U  | 129.04                              | 117.69 | 30.92                                | 11.16 | 52.21        | 8.92  |
| SH-B  | 100.19                              | 81.46  | 22.17                                | 0.80  | 12.97        | 3.66  |
| SH-U  | 111.04                              | 120.69 | 21.59                                | 28.62 | 18.79        | 29.72 |
| WH-B  | 141.45                              | 168.78 | 37.37                                | 22.60 | 22.65        | 24.69 |
| WH-U  | 118.03                              | 166.14 | 34.38                                | 22.70 | 30.48        | 25.10 |
| ZZ-B  | 127.76                              | 169.24 | 40.71                                | 17.21 | 29.79        | 15.89 |
| ZZ-U  | 131.35                              | 161.50 | 46.06                                | 14.93 | 28.13        | 13.71 |
| CD-B  | 100.85                              | 119.01 | 37.98                                | 14.55 | 39.43        | 27.64 |
| CD-U  | 130.86                              | 131.87 | 25.09                                | 43.52 | 34.72        | 62.36 |
| GY-B  | 58.18                               | 68.08  | 11.44                                | 8.92  | 26.06        | 9.50  |
| GY-U  | 53.82                               | 66.69  | 25.59                                | 8.77  | 22.83        | 9.41  |
| GZ-B  | 78.29                               | 140.98 | 19.38                                | 7.20  | 15.92        | 12.84 |
| GZ-U  | 88.29                               | 137.19 | 24.12                                | 12.75 | 24.19        | 17.05 |
| SZ    | 89.23                               | 106.51 | 36.27                                | 38.40 | 34.09        | 33.41 |
| HZ    | 66.31                               | 62.82  | 22.62                                | 21.40 | 26.86        | 24.84 |
| JM    | 104.29                              | 100.04 | 29.44                                | 18.48 | 28.68        | 22.02 |
| DG    | 66.71                               | 102.58 | 40.43                                | 29.02 | 32.08        | 25.06 |
| FS    | 68.93                               | 98.16  | 33.29                                | 38.47 | 32.76        | 33.08 |
| ZQ    | 80.24                               | 89.25  | 30.06                                | 12.92 | 31.98        | 22.44 |
| ZS    | 95.78                               | 118.94 | 18.83                                | 23.21 | 27.29        | 23.18 |
| ZH    | 103.82                              | 147.99 | 24.00                                | 17.99 | 28.53        | 20.26 |

15  
16

17 Table S5. The mean, median, maximum (max), minimum (min), and standard deviation (std)  
 18 values of the ratios and differences (Diff) for 5 VOCs groups, ARO2MN and BENZ at 18 urban  
 19 sites, accurate to two places of decimals

|                |        | Alkanes | Alkenes | Aromatics | ARO2MN<br>(Aromatics) | BENZ<br>(Aromatics) | Alkyne | HCHO  |
|----------------|--------|---------|---------|-----------|-----------------------|---------------------|--------|-------|
| Ratio(pre/obs) | mean   | 0.66    | 0.72    | 1.46      | 0.44                  | 3.29                | 0.53   | 1.83  |
|                | median | 0.59    | 0.69    | 1.41      | 0.32                  | 2.75                | 0.42   | 1.19  |
|                | max    | 1.87    | 2.46    | 3.29      | 1.96                  | 9.01                | 1.50   | 8.70  |
|                | min    | 0.13    | 0.09    | 0.10      | 0.05                  | 0.14                | 0.09   | 0.25  |
|                | std    | 0.42    | 0.54    | 0.84      | 0.46                  | 1.97                | 0.34   | 1.91  |
| Diff(pre-obs)  | mean   | -5.78   | -3.29   | 1.07      | -0.26                 | 0.42                | -1.23  | 0.58  |
|                | median | -5.42   | -2.17   | 1.61      | -0.18                 | 0.54                | -1.35  | 0.54  |
|                | max    | 14.12   | 3.50    | 6.09      | 0.24                  | 1.28                | 0.87   | 5.57  |
|                | min    | -19.40  | -15.50  | -8.18     | -0.74                 | -2.58               | -2.64  | -8.90 |
|                | std    | 7.82    | 4.86    | 3.68      | 0.24                  | 0.81                | 0.97   | 2.95  |

20

21 Table S6. Impact of improvement of emission inventory. Median of ratio of predicted to  
 22 observed values for each urban site after adjusting emission coefficients for individual  
 23 species or both of them in MEIC

| Cases in CMAQ        | O <sub>3</sub> | NO <sub>2</sub> | ALK2  | ARO2MN | BENZ  | OLE1  | PRPE  | ACYE  |
|----------------------|----------------|-----------------|-------|--------|-------|-------|-------|-------|
| base case            | 1.240          | 0.623           | 0.270 | 0.325  | 2.541 | 0.340 | 0.445 | 0.468 |
| case_NO <sub>x</sub> | 1.164          | 0.833           |       |        |       |       |       |       |
| case_ALK2            | 1.243          |                 | 0.789 |        |       |       |       |       |
| case_ARO2MN          | 1.250          |                 |       | 0.863  |       |       |       |       |
| case_BENZ            | 1.240          |                 |       |        | 1.556 |       |       |       |
| case_OLE1            | 1.249          |                 |       |        |       | 0.522 |       |       |
| case_PRPE            | 1.248          |                 |       |        |       |       | 0.688 |       |
| case_ACYE            | 1.241          |                 |       |        |       |       |       | 0.978 |
| case_all             | 1.269          | 0.622           | 0.791 | 0.863  | 1.556 | 0.687 | 0.652 | 0.981 |

24

25

26

27 Table S7. The mean, median, max, min, and std values of the ratios for predicted/observed  
 28 TVOCs for 28 sites in base case and eight new cases, accurate to two places of decimals

|             | mean | median | max  | min  | std                |
|-------------|------|--------|------|------|--------------------|
| base case   | 0.70 | 0.74   | 1.90 | 0.15 | 0.40 <sup>30</sup> |
| case_NOx    | 0.70 | 0.73   | 1.91 | 0.14 | 0.40               |
| case_ALK2   | 0.75 | 0.79   | 2.04 | 0.16 | 0.42 <sup>31</sup> |
| case_ARO2MN | 0.71 | 0.75   | 1.93 | 0.15 | 0.40 <sup>32</sup> |
| case_BENZ   | 0.69 | 0.73   | 1.87 | 0.14 | 0.39 <sup>33</sup> |
| case_OLE1   | 0.72 | 0.75   | 1.94 | 0.15 | 0.41 <sup>34</sup> |
| case_PRPE   | 0.71 | 0.75   | 1.94 | 0.15 | 0.40 <sup>35</sup> |
| case_ACYE   | 0.74 | 0.78   | 2.00 | 0.15 | 0.42 <sup>36</sup> |
| case_all    | 0.81 | 0.86   | 2.25 | 0.17 | 0.47 <sup>37</sup> |

39  
 40 Table S8. The mean, median, max, min, and std values of O<sub>3</sub> changes were calculated for  
 41 eight new cases relative to the base case for 28 sites, accurate to two places of decimals

|             | mean  | median | max   | min     | std                 |
|-------------|-------|--------|-------|---------|---------------------|
| case_NOx    | 0.02% | 1.01%  | 8.66% | -12.29% | 5.69% <sup>43</sup> |
| case_ALK2   | 0.30% | 0.31%  | 0.54% | 0.13%   | 0.10%               |
| case_ARO2MN | 0.82% | 0.68%  | 2.41% | 0.06%   | 0.54% <sup>44</sup> |
| case_BENZ   | 0.01% | 0.00%  | 0.09% | -0.07%  | 0.04% <sup>45</sup> |
| case_OLE1   | 0.79% | 0.76%  | 1.78% | 0.19%   | 0.40%               |
| case_PRPE   | 0.63% | 0.55%  | 1.81% | 0.14%   | 0.35% <sup>46</sup> |
| case_ACYE   | 0.01% | 0.02%  | 0.05% | -0.03%  | 0.02% <sup>47</sup> |
| case_all    | 2.51% | 2.32%  | 6.27% | 0.62%   | 1.28%               |

49  
 50  
 51  
 52  
 53

54 Table S9. Model performance of temperature (T2) and relative humidity (RH) in the 28 sites  
 55 from June 6th to August 24th, 2018

| sites      | T2 (°C) |       |                |             |      | RH (%) |       |        |       |       |
|------------|---------|-------|----------------|-------------|------|--------|-------|--------|-------|-------|
|            | OBS     | PRE   | MB             | ME          | RMSE | OBS    | PRE   | MB     | ME    | RMSE  |
| BJ-B       | 26.51   | 26.63 | 0.12           | 1.27        | 1.61 | 74.99  | 61.60 | -13.39 | 14.11 | 16.50 |
| BJ-U       | 27.46   | 29.51 | <b>2.05</b>    | <b>2.09</b> | 2.58 | 67.23  | 49.64 | -17.59 | 17.66 | 19.27 |
| SJZ-B      | 28.56   | 29.38 | 0.83           | 1.34        | 1.63 | 65.24  | 51.28 | -13.96 | 14.09 | 16.03 |
| SJZ-U      | 28.07   | 29.38 | <b>1.32</b>    | 1.60        | 2.05 | 66.23  | 51.28 | -14.95 | 14.97 | 17.32 |
| JN-B       | 28.11   | 28.45 | 0.34           | 1.08        | 1.49 | 66.56  | 61.32 | -5.23  | 7.32  | 9.75  |
| JN-U       | 28.11   | 28.45 | 0.34           | 1.08        | 1.49 | 66.56  | 61.32 | -5.23  | 7.32  | 9.75  |
| LZ-B       | 19.41   | 19.00 | -0.41          | 0.85        | 1.09 | 71.23  | 65.58 | -5.66  | 7.64  | 9.14  |
| LZ-U       | 23.36   | 22.24 | <b>-1.13</b>   | 1.29        | 1.53 | 58.30  | 52.92 | -5.37  | 6.45  | 8.15  |
| SH-B       | 27.21   | 23.55 | <b>-3.66</b>   | <b>3.93</b> | 4.62 | 85.48  | 92.74 | 7.26   | 8.92  | 10.62 |
| SH-U       | 28.40   | 28.94 | <b>0.54</b>    | 0.99        | 1.22 | 75.48  | 66.03 | -9.46  | 9.75  | 10.83 |
| WH-B       | 29.19   | 29.25 | 0.07           | 0.91        | 1.20 | 75.27  | 70.62 | -4.65  | 6.25  | 8.04  |
| WH-U       | 29.19   | 29.25 | 0.07           | 0.91        | 1.20 | 75.27  | 70.62 | -4.65  | 6.25  | 8.04  |
| ZZ-B       | 29.05   | 30.05 | <b>1.00</b>    | 1.17        | 1.50 | 65.88  | 54.92 | -10.96 | 11.24 | 13.04 |
| ZZ-U       | 29.25   | 29.42 | 0.17           | 1.01        | 1.28 | 65.69  | 59.09 | -6.60  | 9.56  | 11.06 |
| CD-B       | 25.90   | 26.21 | 0.31           | 1.00        | 1.27 | 87.03  | 77.37 | -9.66  | 9.95  | 12.23 |
| CD-U       | 26.10   | 27.13 | <b>1.03</b>    | 1.36        | 1.65 | 82.16  | 72.21 | -9.94  | 10.53 | 12.48 |
| GY-B       | 22.93   | 21.84 | <b>-1.10</b>   | 1.12        | 1.32 | 76.95  | 86.56 | 9.61   | 9.61  | 10.56 |
| GY-U       | 24.12   | 21.84 | <b>-2.28</b>   | <b>2.28</b> | 2.42 | 75.85  | 86.56 | 10.71  | 10.71 | 11.69 |
| GZ-B       | 27.74   | 27.20 | -0.54          | 0.89        | 1.11 | 87.30  | 81.71 | -5.59  | 6.25  | 7.98  |
| GZ-U       | 28.12   | 31.27 | <b>3.15</b>    | <b>3.15</b> | 3.38 | 84.48  | 62.21 | -22.27 | 22.27 | 23.17 |
| SZ         | 28.38   | 30.53 | <b>2.15</b>    | <b>2.20</b> | 2.35 | 83.16  | 65.96 | -17.20 | 17.20 | 17.84 |
| HZ         | 27.95   | 28.00 | 0.05           | 0.89        | 1.12 | 83.42  | 79.16 | -4.26  | 5.79  | 7.04  |
| JM         | 28.74   | 28.52 | -0.22          | 0.79        | 0.98 | 83.56  | 78.71 | -4.85  | 6.23  | 7.55  |
| DG         | 28.38   | 31.36 | <b>2.98</b>    | <b>2.98</b> | 3.15 | 81.59  | 62.09 | -19.50 | 19.50 | 20.42 |
| FS         | 29.03   | 31.80 | <b>2.77</b>    | <b>2.77</b> | 2.93 | 79.31  | 60.25 | -19.06 | 19.06 | 19.74 |
| ZQ         | 27.92   | 28.04 | 0.12           | 0.91        | 1.06 | 84.76  | 80.73 | -4.04  | 5.65  | 6.86  |
| ZS         | 28.63   | 30.86 | <b>2.23</b>    | <b>2.24</b> | 2.41 | 86.39  | 65.91 | -20.48 | 20.48 | 21.21 |
| ZH         | 28.42   | 28.54 | 0.13           | 0.98        | 1.20 | 82.75  | 87.53 | 4.78   | 7.02  | 8.55  |
| Benchmarks |         |       | $\leq \pm 0.5$ | $\leq 2.0$  |      |        |       |        |       |       |

56 RMSE: root mean square error. The performance criteria for T2 were suggested by (Emery et  
 57 al., 2001). The values that exceed the criteria were highlighted in bold.

58

59

60

61 Table S10. Model performance of wind speed (WS) and wind direction (WD) in the 28 sites  
 62 from June 6th to August 24th, 2018

| sites      | WS (m/s) |      |                |             |             | WD (°) |        |               |               |       |
|------------|----------|------|----------------|-------------|-------------|--------|--------|---------------|---------------|-------|
|            | OBS      | PRE  | MB             | ME          | RMSE        | OBS    | PRE    | MB            | ME            | RMSE  |
| BJ-B       | 1.75     | 2.67 | <b>0.92</b>    | 0.97        | 1.19        | 192.45 | 129.46 | <b>-62.99</b> | <b>67.84</b>  | 80.15 |
| BJ-U       | 1.82     | 2.43 | <b>0.61</b>    | 0.74        | 0.95        | 130.57 | 144.46 | <b>13.88</b>  | <b>38.27</b>  | 51.37 |
| SJZ-B      | 1.73     | 2.83 | <b>1.10</b>    | 1.15        | 1.34        | 165.69 | 155.74 | -9.95         | <b>37.99</b>  | 52.44 |
| SJZ-U      | 2.31     | 2.83 | <b>0.53</b>    | 0.70        | 0.88        | 180.14 | 155.74 | <b>-24.40</b> | <b>45.03</b>  | 60.91 |
| JN-B       | 3.22     | 3.76 | <b>0.54</b>    | 0.82        | 0.99        | 142.89 | 146.54 | 3.65          | 19.84         | 25.48 |
| JN-U       | 3.22     | 3.76 | <b>0.54</b>    | 0.82        | 0.99        | 142.89 | 146.54 | 3.65          | 19.84         | 25.48 |
| LZ-B       | 2.59     | 3.24 | <b>0.65</b>    | 0.79        | 0.92        | 183.44 | 147.74 | <b>-35.71</b> | <b>45.89</b>  | 66.64 |
| LZ-U       | 1.47     | 2.70 | <b>1.23</b>    | 1.23        | 1.39        | 124.15 | 130.88 | 6.74          | <b>42.11</b>  | 53.33 |
| SH-B       | 3.99     | 6.14 | <b>2.15</b>    | <b>2.16</b> | <b>2.59</b> | 124.58 | 122.10 | -2.48         | 18.50         | 27.98 |
| SH-U       | 0.39     | 3.69 | <b>3.30</b>    | <b>3.30</b> | <b>3.52</b> | 66.66  | 129.84 | <b>63.18</b>  | <b>65.19</b>  | 77.48 |
| WH-B       | 3.01     | 2.54 | -0.47          | 0.65        | 0.81        | 157.99 | 142.73 | <b>-15.26</b> | <b>46.70</b>  | 67.92 |
| WH-U       | 3.01     | 2.54 | -0.47          | 0.65        | 0.81        | 157.99 | 142.73 | <b>-15.26</b> | <b>46.70</b>  | 67.92 |
| ZZ-B       | 1.99     | 3.04 | <b>1.05</b>    | 1.11        | 1.46        | 144.26 | 135.84 | -8.42         | <b>30.04</b>  | 38.62 |
| ZZ-U       | 2.58     | 3.22 | <b>0.65</b>    | 0.81        | 1.14        | 141.91 | 136.46 | -5.45         | 29.11         | 42.43 |
| CD-B       | 2.03     | 2.21 | 0.18           | 0.53        | 0.71        | 142.02 | 117.14 | <b>-24.87</b> | <b>49.27</b>  | 60.78 |
| CD-U       | 1.40     | 2.02 | <b>0.62</b>    | 0.73        | 0.83        | 163.73 | 149.16 | <b>-14.57</b> | <b>41.82</b>  | 52.33 |
| GY-B       | 2.66     | 3.34 | <b>0.68</b>    | 0.87        | 1.15        | 141.62 | 154.37 | <b>12.75</b>  | <b>30.86</b>  | 42.07 |
| GY-U       | 2.00     | 3.34 | <b>1.34</b>    | 1.45        | 1.85        | 151.02 | 154.37 | 3.36          | <b>32.10</b>  | 45.16 |
| GZ-B       | 1.61     | 2.63 | <b>1.03</b>    | 1.10        | 1.39        | 126.01 | 139.07 | <b>13.07</b>  | <b>47.50</b>  | 61.43 |
| GZ-U       | 1.93     | 2.74 | <b>0.81</b>    | 0.91        | 1.13        | 147.31 | 139.80 | -6.96         | <b>44.63</b>  | 58.13 |
| SZ         | 2.35     | 3.37 | <b>1.02</b>    | 1.13        | 1.35        | 155.20 | 159.66 | 4.46          | 24.36         | 32.15 |
| HZ         | 2.48     | 3.00 | <b>0.52</b>    | 0.70        | 0.93        | 146.88 | 137.97 | -8.91         | 26.70         | 34.97 |
| JM         | 3.04     | 3.04 | 0.00           | 0.68        | 0.81        | 155.96 | 163.82 | 7.87          | 27.65         | 39.23 |
| DG         | 3.00     | 3.18 | 0.18           | 0.56        | 0.67        | 136.78 | 149.56 | <b>12.79</b>  | 23.61         | 31.29 |
| FS         | 2.75     | 3.02 | 0.27           | 0.62        | 0.74        | 149.55 | 153.86 | 4.32          | <b>32.81</b>  | 42.51 |
| ZQ         | 1.60     | 2.64 | <b>1.04</b>    | 1.06        | 1.23        | 122.24 | 156.20 | <b>33.97</b>  | <b>56.66</b>  | 65.52 |
| ZS         | 2.53     | 3.29 | <b>0.76</b>    | 0.80        | 0.96        | 144.01 | 158.70 | <b>14.69</b>  | 20.44         | 29.20 |
| ZH         | 3.74     | 4.96 | <b>1.22</b>    | 1.27        | 1.53        | 159.18 | 156.30 | -2.88         | 22.25         | 31.82 |
| Benchmarks |          |      | $\leq \pm 0.5$ | $\leq 2.0$  | $\leq 2.0$  |        |        | $\leq \pm 10$ | $\leq \pm 30$ |       |

63 The performance criteria for WS and WD were suggested by (Emery et al., 2001). The values  
 64 that exceed the criteria were highlighted in bold.



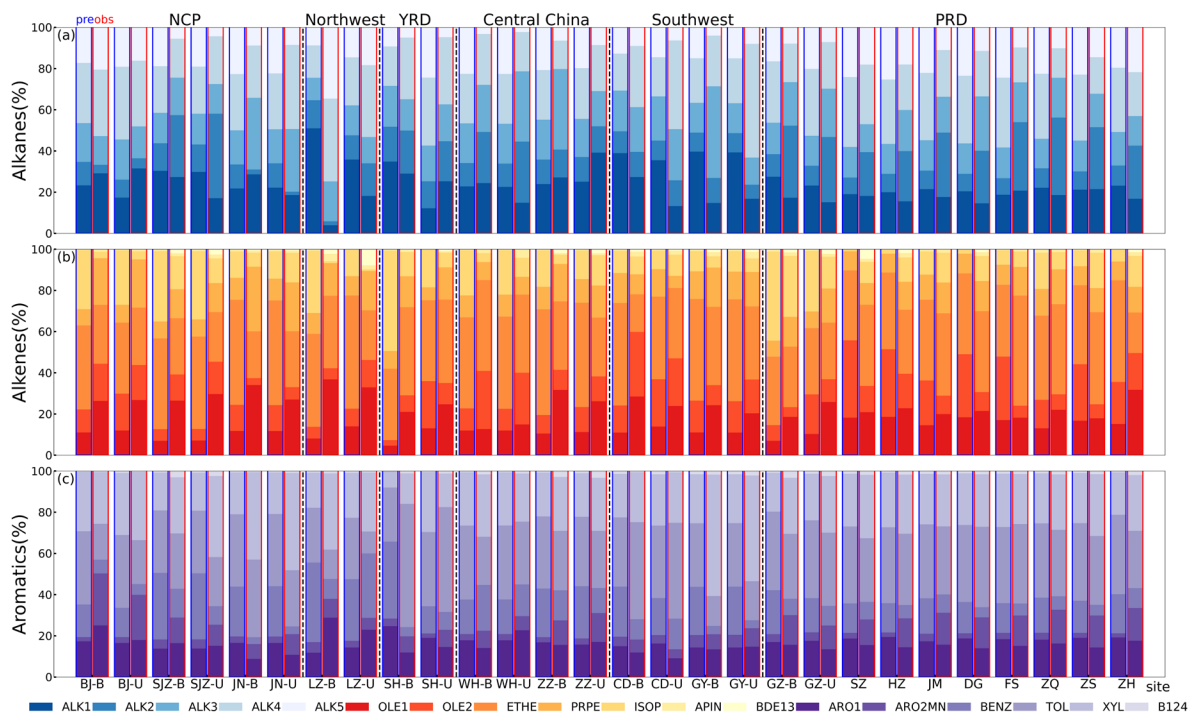

65  
 66 Figure S1. Percentage of predicted and observed VOCs of specific species at 28 sites during  
 67 the study period. For each site, on the left are prediction values with blue edge, and on the  
 68 right are observation values with red edge (a) Alkanes, (b) Alkenes, (c) Aromatics.

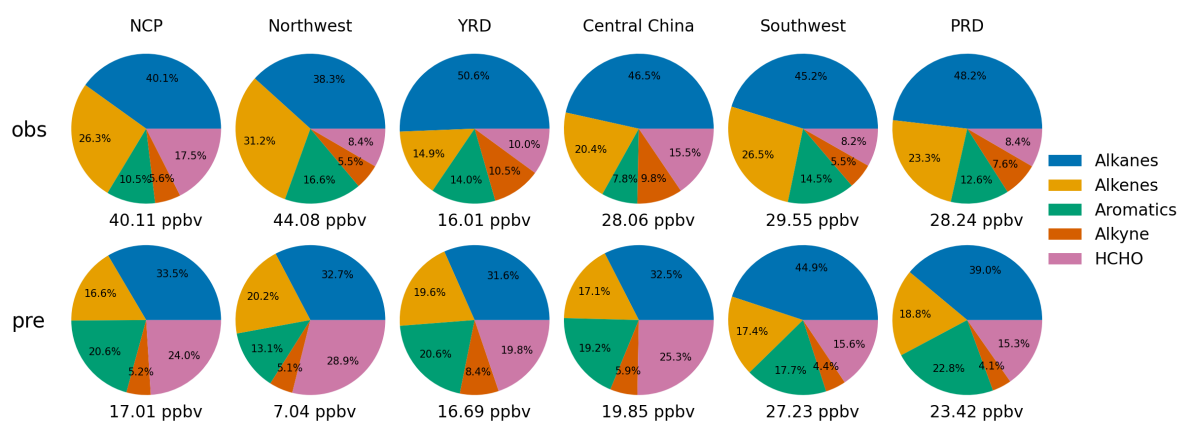

70 Figure S2. Observed and predicted values of different VOCs species groups by regional  
 71 average. TVOCs concentration of each region is shown at the bottom.

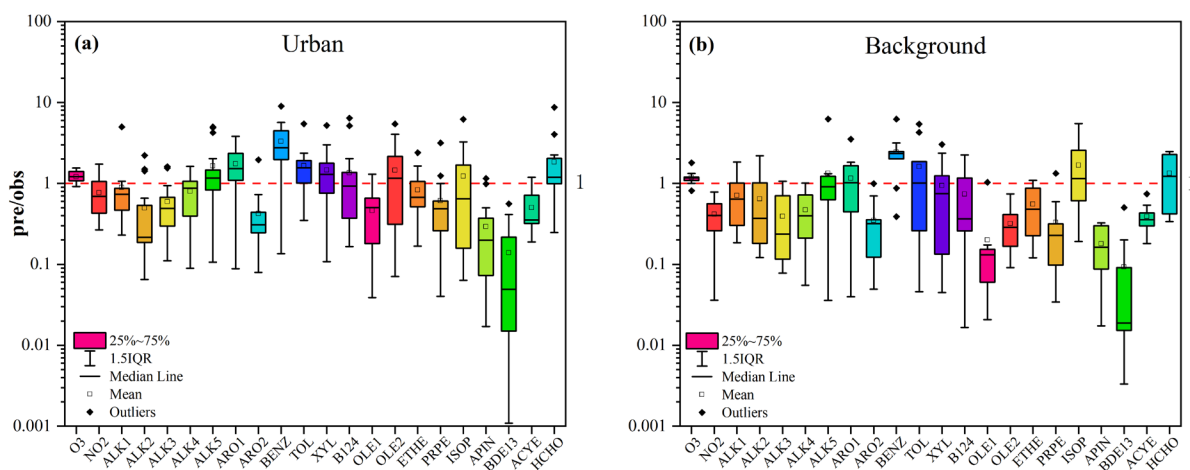

73 Figure S3. Ratio (pre/obs) of O<sub>3</sub>, NO<sub>2</sub> and different VOCs species at (a) urban sites (18 sites)  
 74 and (b) background sites (10 sites).

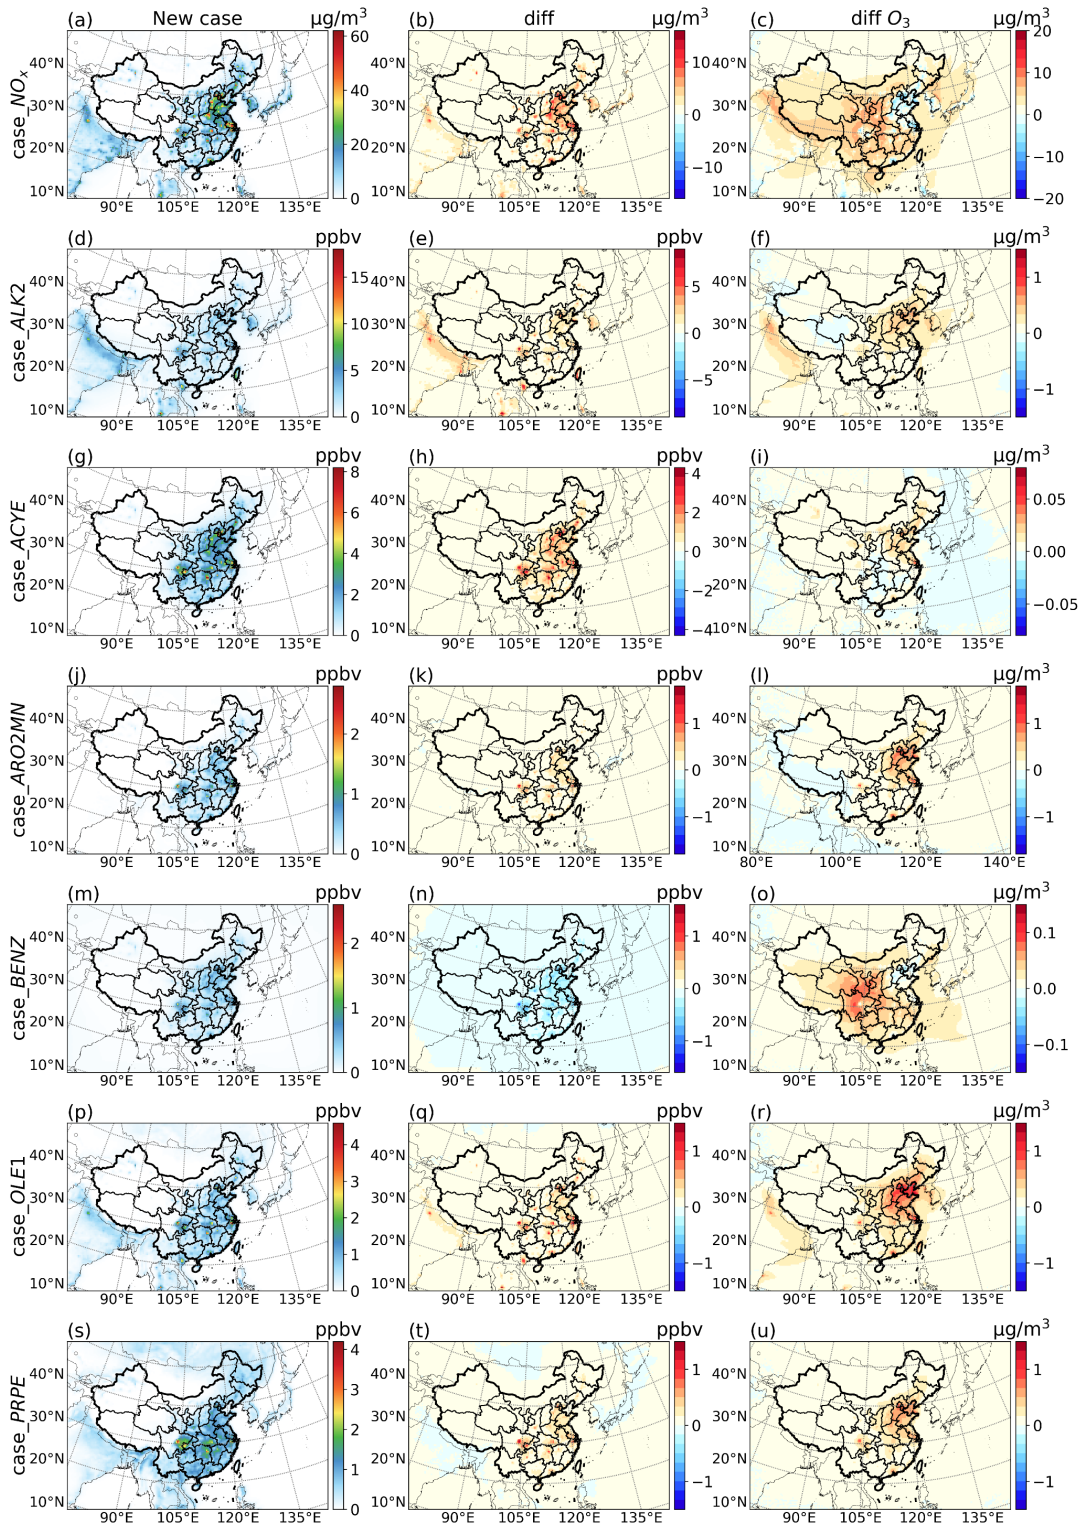

77

78 Figure S4. The difference between the predicted concentration of seven new cases and base

79 case, and the impact on O<sub>3</sub> concentration from June 6th to August 24th in 2018. Concentration

80 of NO<sub>2</sub> is shown in case\_NO<sub>x</sub>.

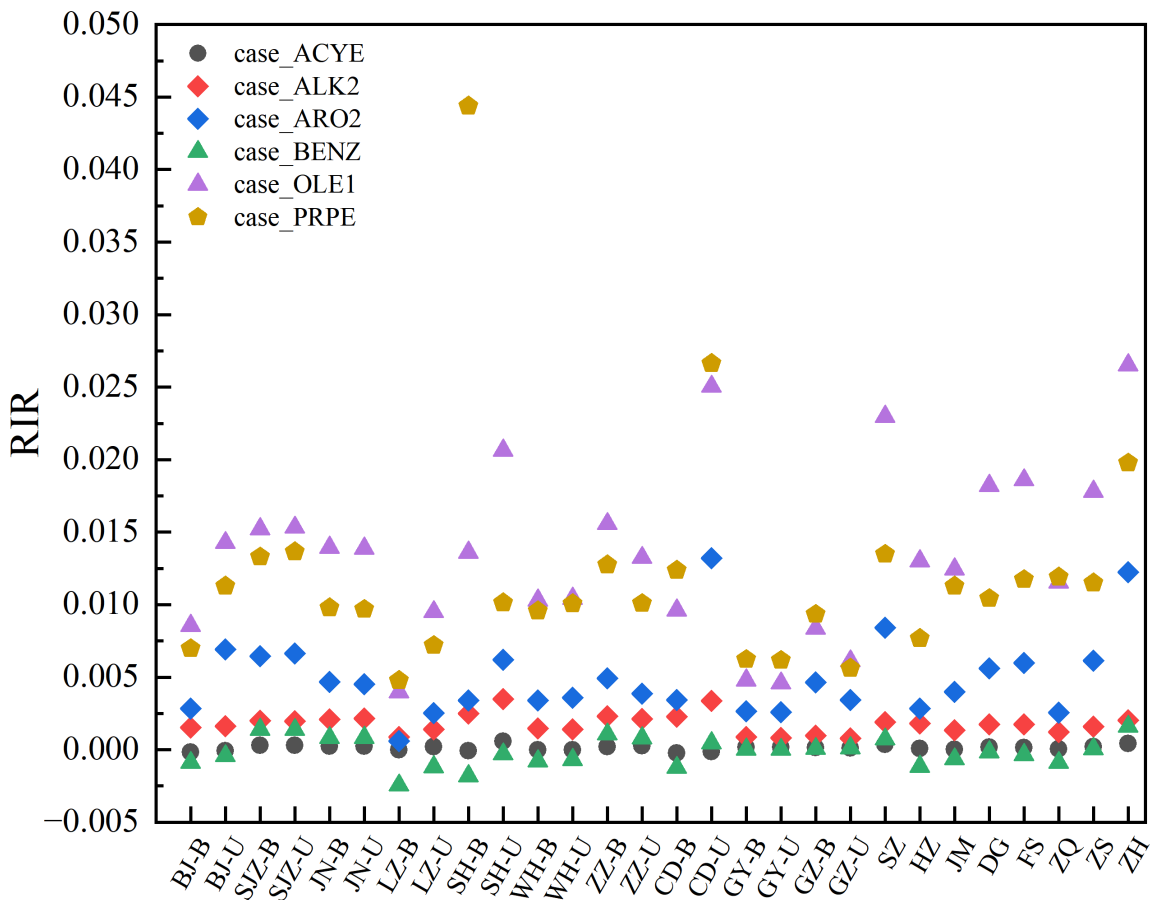

81 Figure S5. Relative Incremental Reactivity (RIR) of 6 VOCs at 28 sites during the study  
 82 period. Each dot represents the RIR of the specific VOCs corresponding to the case at that  
 83 site.  
 84

85 **References**  
 86

87 Emery, C., Edward, T., and Yarwood, G.: Enhanced meteorological modeling and performance evaluation  
 88 for two Texas episodes, Report to the Texas Natural Resources Conservation Commission, ENVIRON,  
 89 International Corp, Novato, CA, available at: [http://www.tceq.state.tx.us/assets/public/implementation/air/  
 90 am/contracts/reports/mm/EnhancedMetModelingAndPerformanceEvaluation.pdf](http://www.tceq.state.tx.us/assets/public/implementation/air/am/contracts/reports/mm/EnhancedMetModelingAndPerformanceEvaluation.pdf), 2001.  
 91 Emery, C., Liu, Z., Russell, A. G., Odman, M. T., Yarwood, G., and Kumar, N.: Recommendations on statistics  
 92 and benchmarks to assess photochemical model performance, J Air Waste Manag Assoc, 67, 582-598,  
 93 10.1080/10962247.2016.1265027, 2017.

94
